# Supplementary material for: Suppressive Effects of the Site 1 Protease (S1P) Inhibitor, PF-429242, on Dengue Virus Propagation
Source: MDPI journal article supplement (doi:10.3390/v8020046), 2016-02-10
Supplement: s1 [file s1]

Article

# Suppressive Effects of the Site 1 Protease (S1P) Inhibitor, PF-429242, on Dengue Virus Propagation

Leo Uchida <sup>1</sup>, Shuzo Urata <sup>2</sup>, Gianne Eduard L. Ulanday <sup>1,3</sup>, Yuki Takamatsu <sup>1</sup>, Jiro Yasuda <sup>2,4</sup>, Kouichi Morita <sup>1,4</sup> and Daisuke Hayasaka <sup>1,4,\*</sup>

Supplementary Material

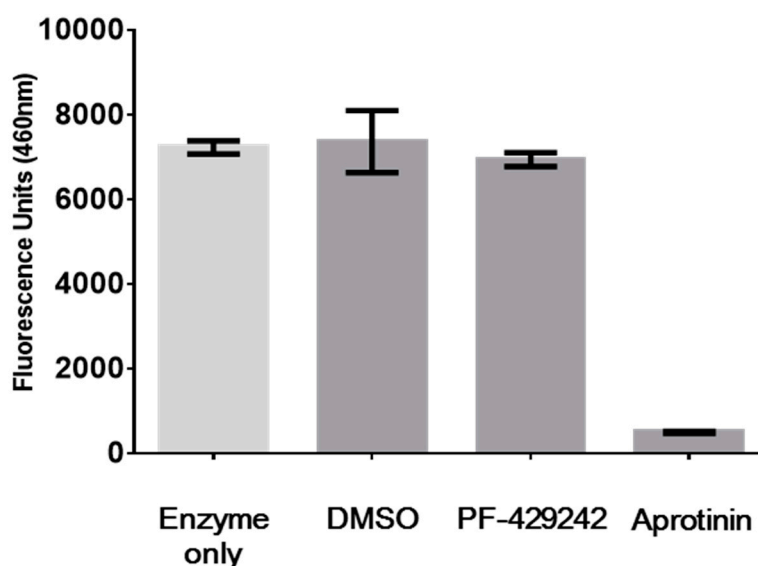

**Figure S1.** Recombinant protein-based in vitro assay of DENV NS2B/3pro. 100  $\mu$ M each of PF-429242 and DENV NS2B/3pro control inhibitor, Aprotinin, were mixed in separate wells containing 1  $\mu$ g/ml of recombinant DENV NS2B/3pro. Mixture was incubated at 25°C for 30 minutes after the addition of 100  $\mu$ M fluorescence-labeled substrate. Fluorescence intensity was measured using ARVO MX/Light 1420 Multilabel / Luminescence counter (Perkin Elmer) at 460 nm. Means are obtained from 2 of duplicate experiments. Error bars show standard deviation.

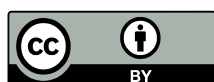

© 2016 by the authors; licensee MDPI, Basel, Switzerland. This article is an open access article distributed under the terms and conditions of the Creative Commons by Attribution (CC-BY) license (<http://creativecommons.org/licenses/by/4.0/>).
